# Supplementary material for: An insight into the outer- and inner-sphere electrochemistry of oxygenated single-walled carbon nanohorns (o-SWCNHs)
Source: Royal Society of Chemistry journal article supplement (doi:10.1039/c9nj04467a), 2019-01-01
Supplement: c9nj04467a1.pdf [file c9nj04467a1.pdf]

***Supporting Information File***

**An Insight into Outer- and Inner- Sphere Electrochemistry on Oxygenated  
Single-Walled Carbon Nanohorns (*o*-SWCNHs)**

**Arvind S. Ambolikar<sup>a,b</sup>, Saurav K. Guin<sup>a,\*</sup> and Suman Neogy<sup>c</sup>**

<sup>a</sup>*Fuel Chemistry Division, Bhabha Atomic Research Centre, Trombay, Mumbai – 400085, India.*

<sup>b</sup>*Homi Bhabha National Institute, Anushaktinagar, Mumbai – 400094, India.*

<sup>c</sup>*Mechanical Metallurgy Division, Bhabha Atomic Research Centre, Trombay, Mumbai, 400085,  
India.*

<sup>\*</sup>*Corresponding Author:* Dr. Saurav K. Guin; *Ph.D., M.Sc.*

*Email:* sauravkrguin@yahoo.co.in, skguin@barc.gov.in

*Tel.:* +91-22-2559-4598/0656;

*Fax:* +91-22-2550-5151

*ORCID ID:* <https://orcid.org/0000-0001-6108-0751>

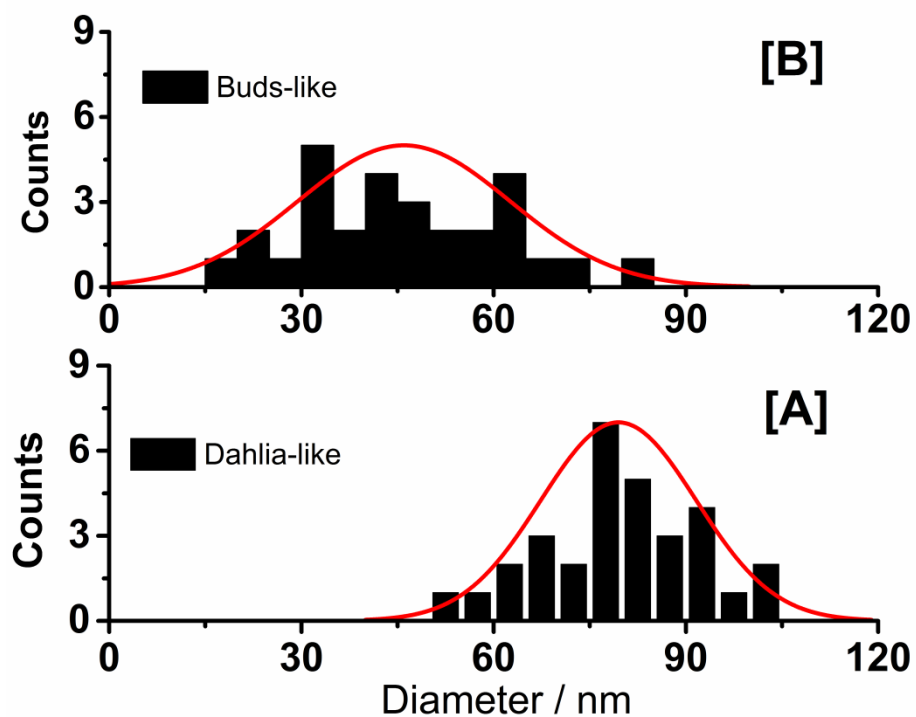

**Fig. S1** The histograms of the diameters of the [A] dahlia-like and [B] bud-like aggregates calculated from Fig. 1[A].

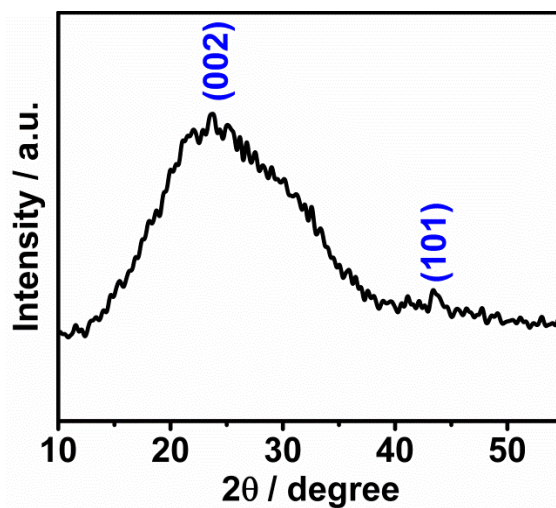

**Fig. S2** The XRD pattern of o-SWCNH.

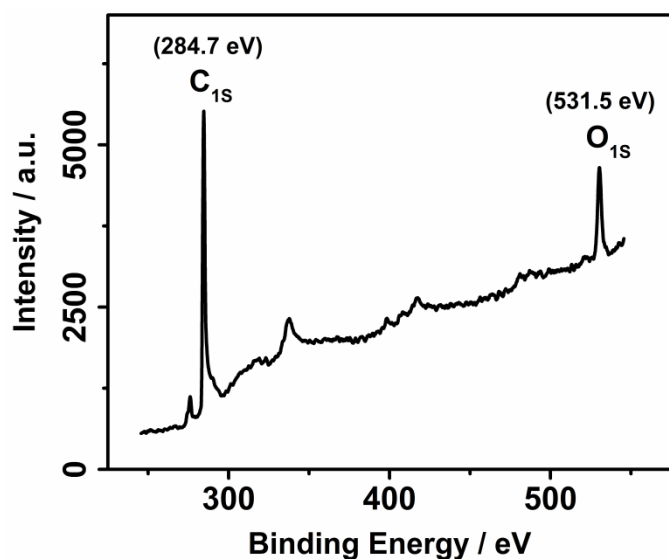

**Fig. S3** The XPS survey spectrum of *o*-SWCNH.

**Table S1** The peak parameters of the CVs of 5 mM  $K_3[Fe(CN)_6]$  in 0.1 M KCl on GC and *o*-SWCNH/GC.

| Scan Rate / $mV s^{-1}$ | GC          |             |                  |                 |                 | <i>o</i> -SWCNH/GC |             |                  |                 |                 |
|-------------------------|-------------|-------------|------------------|-----------------|-----------------|--------------------|-------------|------------------|-----------------|-----------------|
|                         | $E_p^a / V$ | $E_p^c / V$ | $\Delta E_p / V$ | $I_p^a / \mu A$ | $I_p^c / \mu A$ | $E_p^a / V$        | $E_p^c / V$ | $\Delta E_p / V$ | $I_p^a / \mu A$ | $I_p^c / \mu A$ |
| 25                      | 0.2978      | 0.2276      | 0.0702           | 46.8            | -46.0           | 0.2950             | 0.2330      | 0.0620           | 53.8            | -51.5           |
| 50                      | 0.2982      | 0.2260      | 0.0722           | 65.5            | -64.8           | 0.2960             | 0.2330      | 0.0630           | 75.1            | -73.3           |
| 75                      | 0.2997      | 0.2260      | 0.0737           | 79.8            | -78.8           | 0.2970             | 0.2320      | 0.0650           | 90.6            | -89.7           |
| 100                     | 0.3004      | 0.2250      | 0.0754           | 91.4            | -90.9           | 0.2980             | 0.2310      | 0.0670           | 105.3           | -103.2          |
| 150                     | 0.3018      | 0.2240      | 0.0778           | 110.8           | -109.9          | 0.2990             | 0.2300      | 0.0690           | 128.8           | -115.1          |
| 200                     | 0.3022      | 0.2230      | 0.0792           | 127.5           | -126.2          | 0.3000             | 0.2290      | 0.0710           | 148.6           | -146.2          |
| 250                     | 0.3030      | 0.2220      | 0.0810           | 142.0           | -140.4          | 0.3010             | 0.2280      | 0.0730           | 166.0           | -163.5          |
| 300                     | 0.3035      | 0.2217      | 0.0818           | 154.1           | -153.3          | 0.3020             | 0.2270      | 0.0750           | 182.6           | -180.0          |

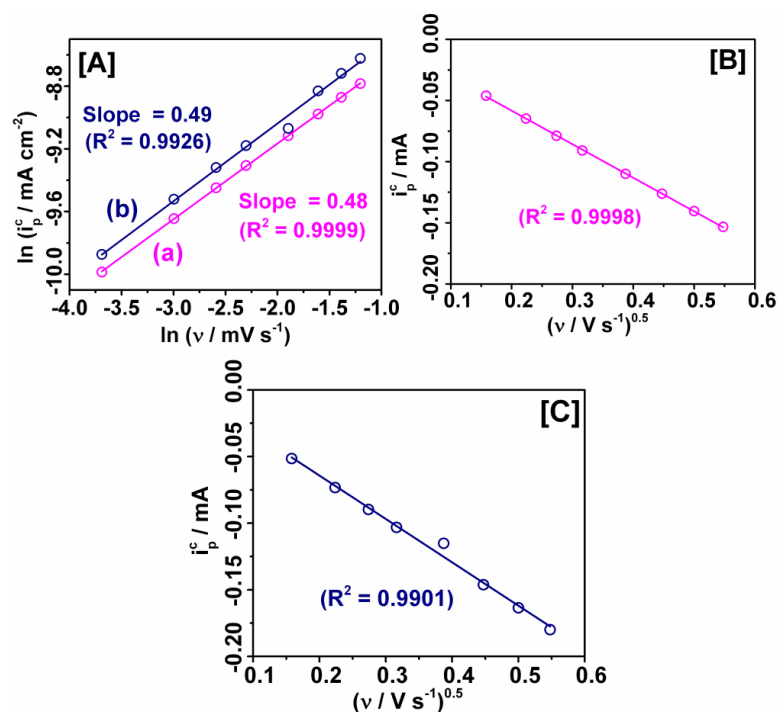

**Fig. S4 [A]** Plot of  $\ln(i_p^c)$  versus  $\ln(v)$  for the redox reaction of  $[\text{Fe}(\text{CN})_6]^{3-}/[\text{Fe}(\text{CN})_6]^{4-}$  in 0.1 M KCl (pH 6.8) on (a) GC and (b) o-SWCNH/GC. Plots of  $i_p^c$  versus  $v^{1/2}$  for the same reaction on [B] GC and [C] o-SWCNH/GC electrodes.

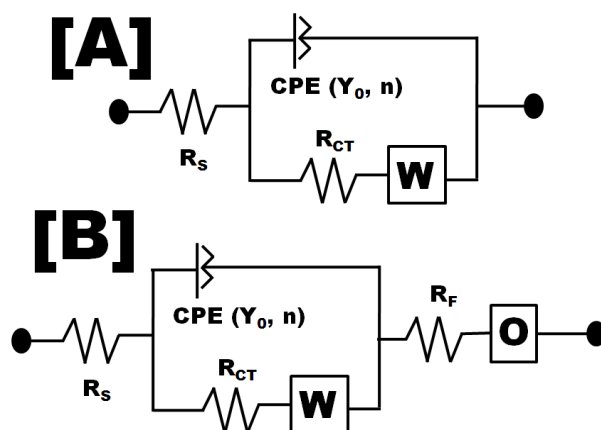

**Fig. S5** The electrical equivalent circuits fitted with the impedance data of 5 mM  $\text{K}_3[\text{Fe}(\text{CN})_6]$  in 0.1 M KCl on [A] GC and [B] o-SWCNH/GC.

**Table S2** The values of the elements of electrical equivalent circuits fitted with the impedance data of 5 mM  $K_3[Fe(CN)_6]$  in 0.1 M KCl on [A] GC and [B] o-SWCNH/GC. The potential was kept constant at 0.263 V with sine potential perturbation with amplitude of 5 mV in the frequency range  $1 \times 10^5$  to  $1 \times 10^{-1}$  Hz.

| Electrode      | $R_s / \Omega$ | $R_{CT} / \Omega$ | CPE                 |      | W                   | $R_F / \Omega$ | O                   |       | $\chi^2$ |
|----------------|----------------|-------------------|---------------------|------|---------------------|----------------|---------------------|-------|----------|
|                |                |                   | $Q_0 / \text{mMho}$ | $n'$ | $Y_0 / \text{mMho}$ |                | $Y_0 / \text{mMho}$ | B     |          |
| GC             | 23.1           | 55.6              | 0.0011              | 0.88 | 1.07                | -              | -                   | -     | 0.0109   |
| o-SWCNH/<br>GC | 12.1           | 0.027             | 0.0001              | 0.73 | 1.19                | 12.07          | 6.09                | 0.033 | 0.0192   |

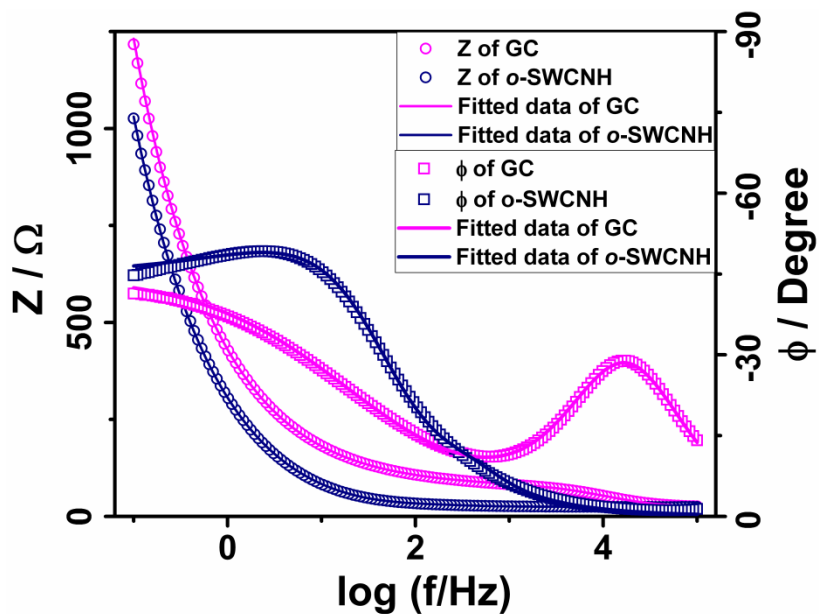

**Fig. S6** The Bode plots of modulus impedance ( $Z$ ) and phase difference ( $\phi$ ) between the applied potential and recorded current of the electrochemical impedance spectra of 5 mM  $K_3[Fe(CN)_6]$  in 0.1 M KCl on GC and o-SWCNH/GC.

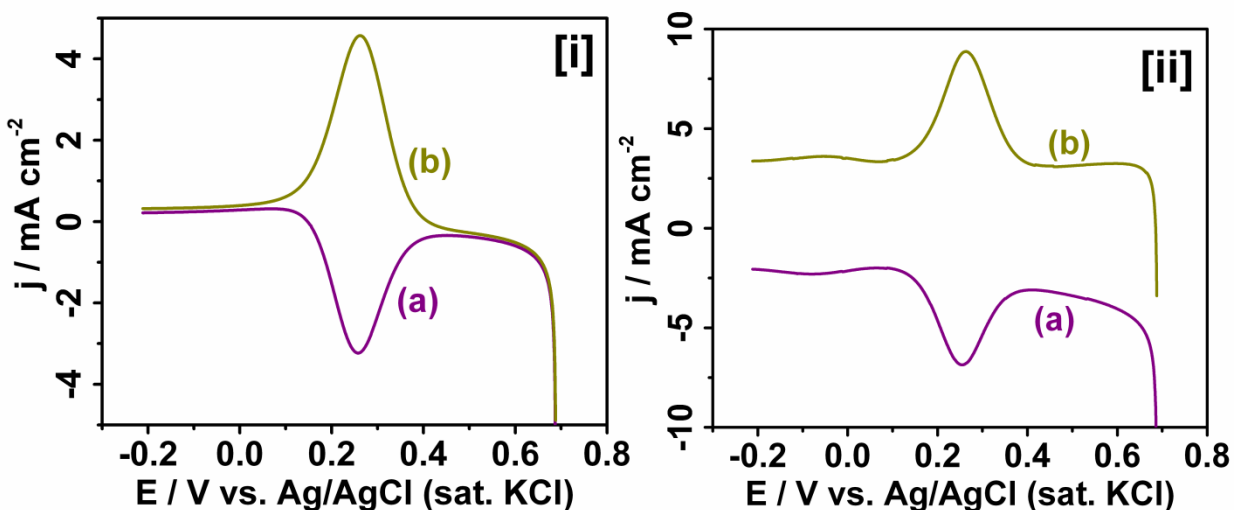

**Fig. S7** Current sampled during the application of (a) forward and (b) reverse pulses in the square wave voltammograms of  $[Fe(CN)_6]^{3-}$  in 0.1 M KCl (pH 6.8) on [i] GC and [ii] *o*-SWCNH/GC.

**Table S3** The peak parameters of the CVs of 5 mM  $[Ru(NH_3)_6]$  in 0.1 M KCl on GC and *o*-SWCNH/GC.

| Scan Rate / $mV s^{-1}$ | GC          |             |                  |                 |                 | <i>o</i> -SWCNH/GC |             |                  |                 |                 |
|-------------------------|-------------|-------------|------------------|-----------------|-----------------|--------------------|-------------|------------------|-----------------|-----------------|
|                         | $E_p^a / V$ | $E_p^c / V$ | $\Delta E_p / V$ | $I_p^a / \mu A$ | $I_p^c / \mu A$ | $E_p^a / V$        | $E_p^c / V$ | $\Delta E_p / V$ | $I_p^a / \mu A$ | $I_p^c / \mu A$ |
| 25                      | -0.095      | -0.170      | 0.075            | 45.3            | -45.1           | -0.095             | -0.176      | 0.081            | 42.6            | -48.9           |
| 50                      | -0.093      | -0.171      | 0.078            | 63.3            | -62.8           | -0.093             | -0.180      | 0.087            | 54.1            | -68.9           |
| 75                      | -0.091      | -0.173      | 0.082            | 77.0            | -76.1           | -0.091             | -0.183      | 0.092            | 64.4            | -83.4           |
| 100                     | -0.089      | -0.174      | 0.085            | 88.5            | -87.9           | -0.090             | -0.186      | 0.096            | 71.1            | -96.2           |
| 150                     | -0.087      | -0.177      | 0.090            | 106.8           | -106.0          | -0.086             | -0.192      | 0.106            | 83.1            | -118.6          |
| 200                     | -0.084      | -0.179      | 0.095            | 121.9           | -123.1          | -0.084             | -0.196      | 0.112            | 89.9            | -137.5          |
| 250                     | -0.083      | -0.181      | 0.098            | 135.9           | -136.2          | -0.081             | -0.201      | 0.120            | 99.8            | -151.9          |
| 300                     | -0.082      | -0.183      | 0.101            | 148.6           | -148.4          | -0.079             | -0.204      | 0.125            | 109.8           | -167.2          |

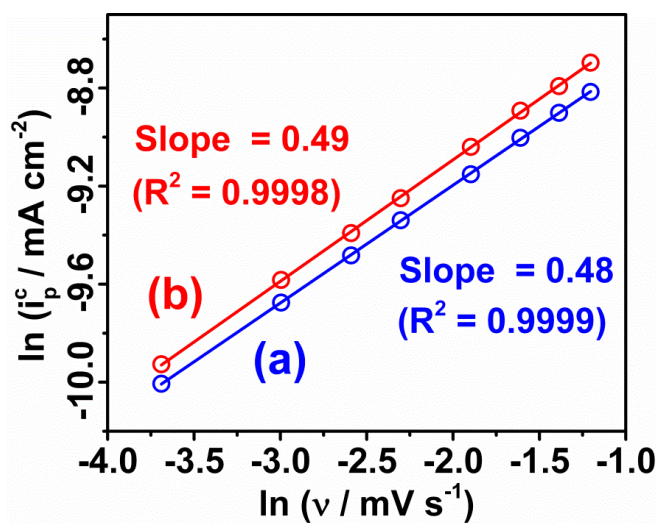

**Fig. S8** Plot of  $\ln(I_p^c)$  versus  $\ln(v)$  for the redox reaction of  $[Ru(NH_3)_6]^{3+}/[Ru(NH_3)_3]^{2+}$  in 0.1 M KCl on (a) GC and (b) *o*-SWCNH/GC.

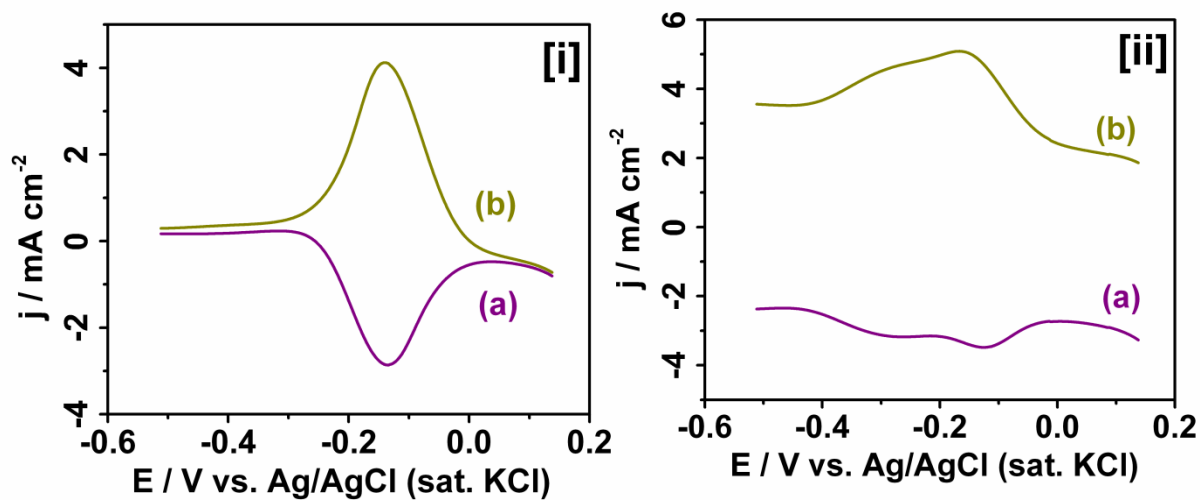

**Fig. S9** Current sampled during the application of (a) forward and (b) reverse pulses in the square wave voltammograms of  $[Ru(NH_3)_6]^{3+}$  in 0.1 M KCl (pH 6.8) on [i] GC and [ii] *o*-SWCNH/GC.

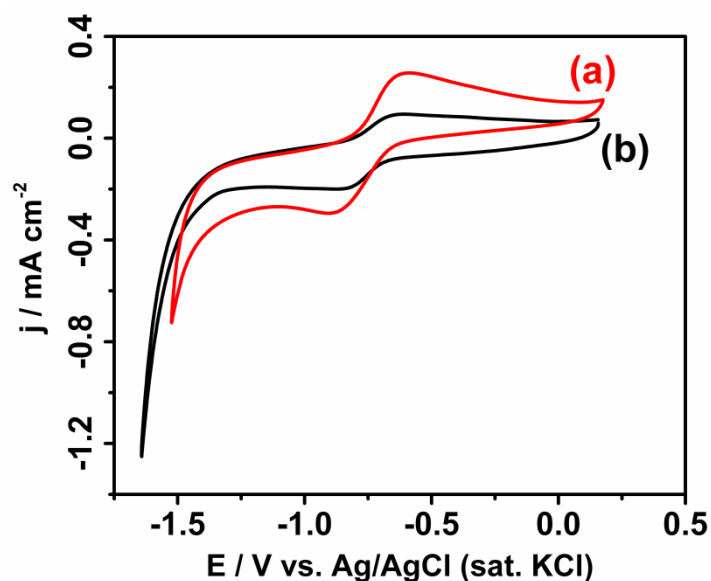

**Fig. S10** CVs of 0.8 mM  $[U^{(VI)}O_2(CO_3)_3]^{4-}$  in sat.  $Na_2CO_3$  (pH 10.9) on (a) *o*-SWCNH/GC and (b) electrochemically reduced *o*-SWCNH/GC at  $v = 25 \text{ mV s}^{-1}$ .

**Table S4** The impedance parameters of 0.8 mM  $[U^{(VI)}O_2(CO_3)_3]^{4-}$  in sat.  $Na_2CO_3$  (pH 10.9) on GC and *o*-SWCNH/GC obtained by fitting the experimentally obtained impedance data with Randles EEC. The potential was kept constant at -0.742 V with sine potential perturbation with amplitude of 10 mV in the frequency range  $1 \times 10^5$  to  $1 \times 10^{-2}$  Hz.

| Parameters         |                       | GC     | <i>o</i> -SWCNH/GC |
|--------------------|-----------------------|--------|--------------------|
| $R_s / \Omega$     |                       | 19.1   | 25.9               |
| $R_{ct} / k\Omega$ |                       | 181    | 3.47               |
| CPE                | $Y_0 / \mu\text{Mho}$ | 2.14   | 69.9               |
|                    | $n$                   | 0.86   | 0.87               |
| W                  | $Y_0 / \mu\text{Mho}$ | 9.9    | 509                |
| $\chi^2$           |                       | 0.6451 | 0.1001             |



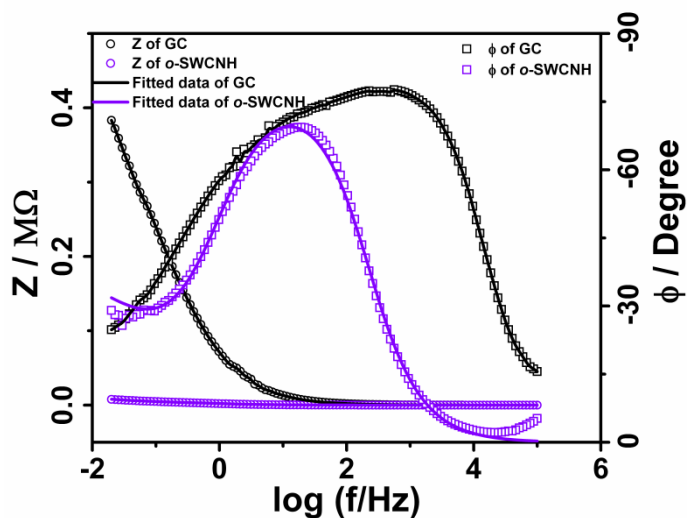

**Fig. S11** The Bode plots of modulus impedance ( $Z$ ) and phase difference ( $\phi$ ) between the applied potential and recorded current of the electrochemical impedance spectra of 0.8 mM  $[U^{(VI)}O_2(CO_3)_3]^{4+}$  in sat.  $Na_2CO_3$  on GC and *o*-SWCNH/GC.

**Table S5** The peak parameters of the CVs of 0.8 mM  $[U^{(VI)}O_2(CO_3)_3]^{4+}$  in sat.  $Na_2CO_3$  on GC and *o*-SWCNH/GC.

| Scan Rate / $mV s^{-1}$ | GC          |             |                  |                      |                      | <i>o</i> -SWCNH/GC |             |                  |                      |                      |
|-------------------------|-------------|-------------|------------------|----------------------|----------------------|--------------------|-------------|------------------|----------------------|----------------------|
|                         | $E_p^a / V$ | $E_p^c / V$ | $\Delta E_p / V$ | $j_p^a / mA cm^{-2}$ | $j_p^c / mA cm^{-2}$ | $E_p^a / V$        | $E_p^c / V$ | $\Delta E_p / V$ | $j_p^a / mA cm^{-2}$ | $j_p^c / mA cm^{-2}$ |
| 25                      | -0.218      | -1.265      | 1.047            | 0.10                 | -0.19                | -0.588             | -0.906      | 0.318            | 0.23                 | -0.26                |
| 50                      | -0.174      | -1.321      | 1.147            | 0.15                 | -0.25                | -0.547             | -0.927      | 0.380            | 0.31                 | -0.33                |
| 75                      | -0.149      | -1.346      | 1.197            | 0.19                 | -0.31                | -0.523             | -0.941      | 0.418            | 0.37                 | -0.37                |
| 100                     | -0.129      | -1.370      | 1.241            | 0.21                 | -0.35                | -0.504             | -0.960      | 0.456            | 0.42                 | -0.42                |
| 150                     | -0.105      | -1.390      | 1.285            | 0.26                 | -0.42                | -0.476             | -0.976      | 0.500            | 0.46                 | -0.49                |
| 200                     | -0.085      | -1.407      | 1.322            | 0.29                 | -0.48                | -0.455             | -0.996      | 0.541            | 0.52                 | -0.53                |
| 250                     | -0.070      | -1.417      | 1.347            | 0.33                 | -0.53                | -0.431             | -1.025      | 0.594            | 0.57                 | -0.58                |
| 300                     | -0.055      | -1.428      | 1.373            | 0.35                 | -0.57                | -0.410             | -1.050      | 0.640            | 0.60                 | -0.61                |

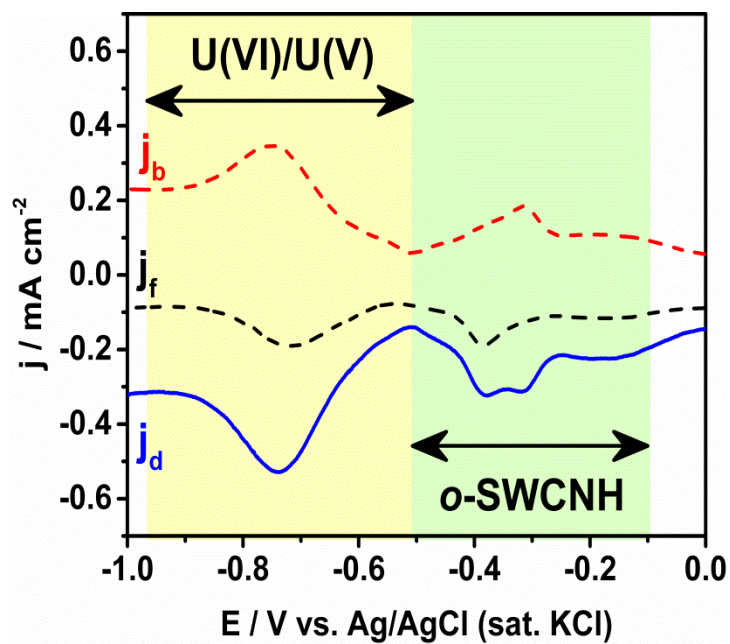

**Fig. S12** The forward (i.e., cathodic,  $j_f$ ), backward (i.e., anodic,  $j_b$ ) and difference (i.e.,  $j_d = j_f - j_b$ ) current densities in the cathodic square wave voltammogram of 0.8 mM  $[U^{(VI)}O_2(CO_3)_3]^{4-}$  in sat.  $Na_2CO_3$  (pH 10.9) on  $o\text{-SWCNH}$  at amplitude and frequency 0.05 V and 50 Hz, respectively.
